# Supplementary material for: Genome-wide association study identifies two loci influencing plasma neurofilament light levels
Source: PubMed Central journal article supplement (PMC5946407; doi:10.1186/s12920-018-0364-8), 2018-05-10

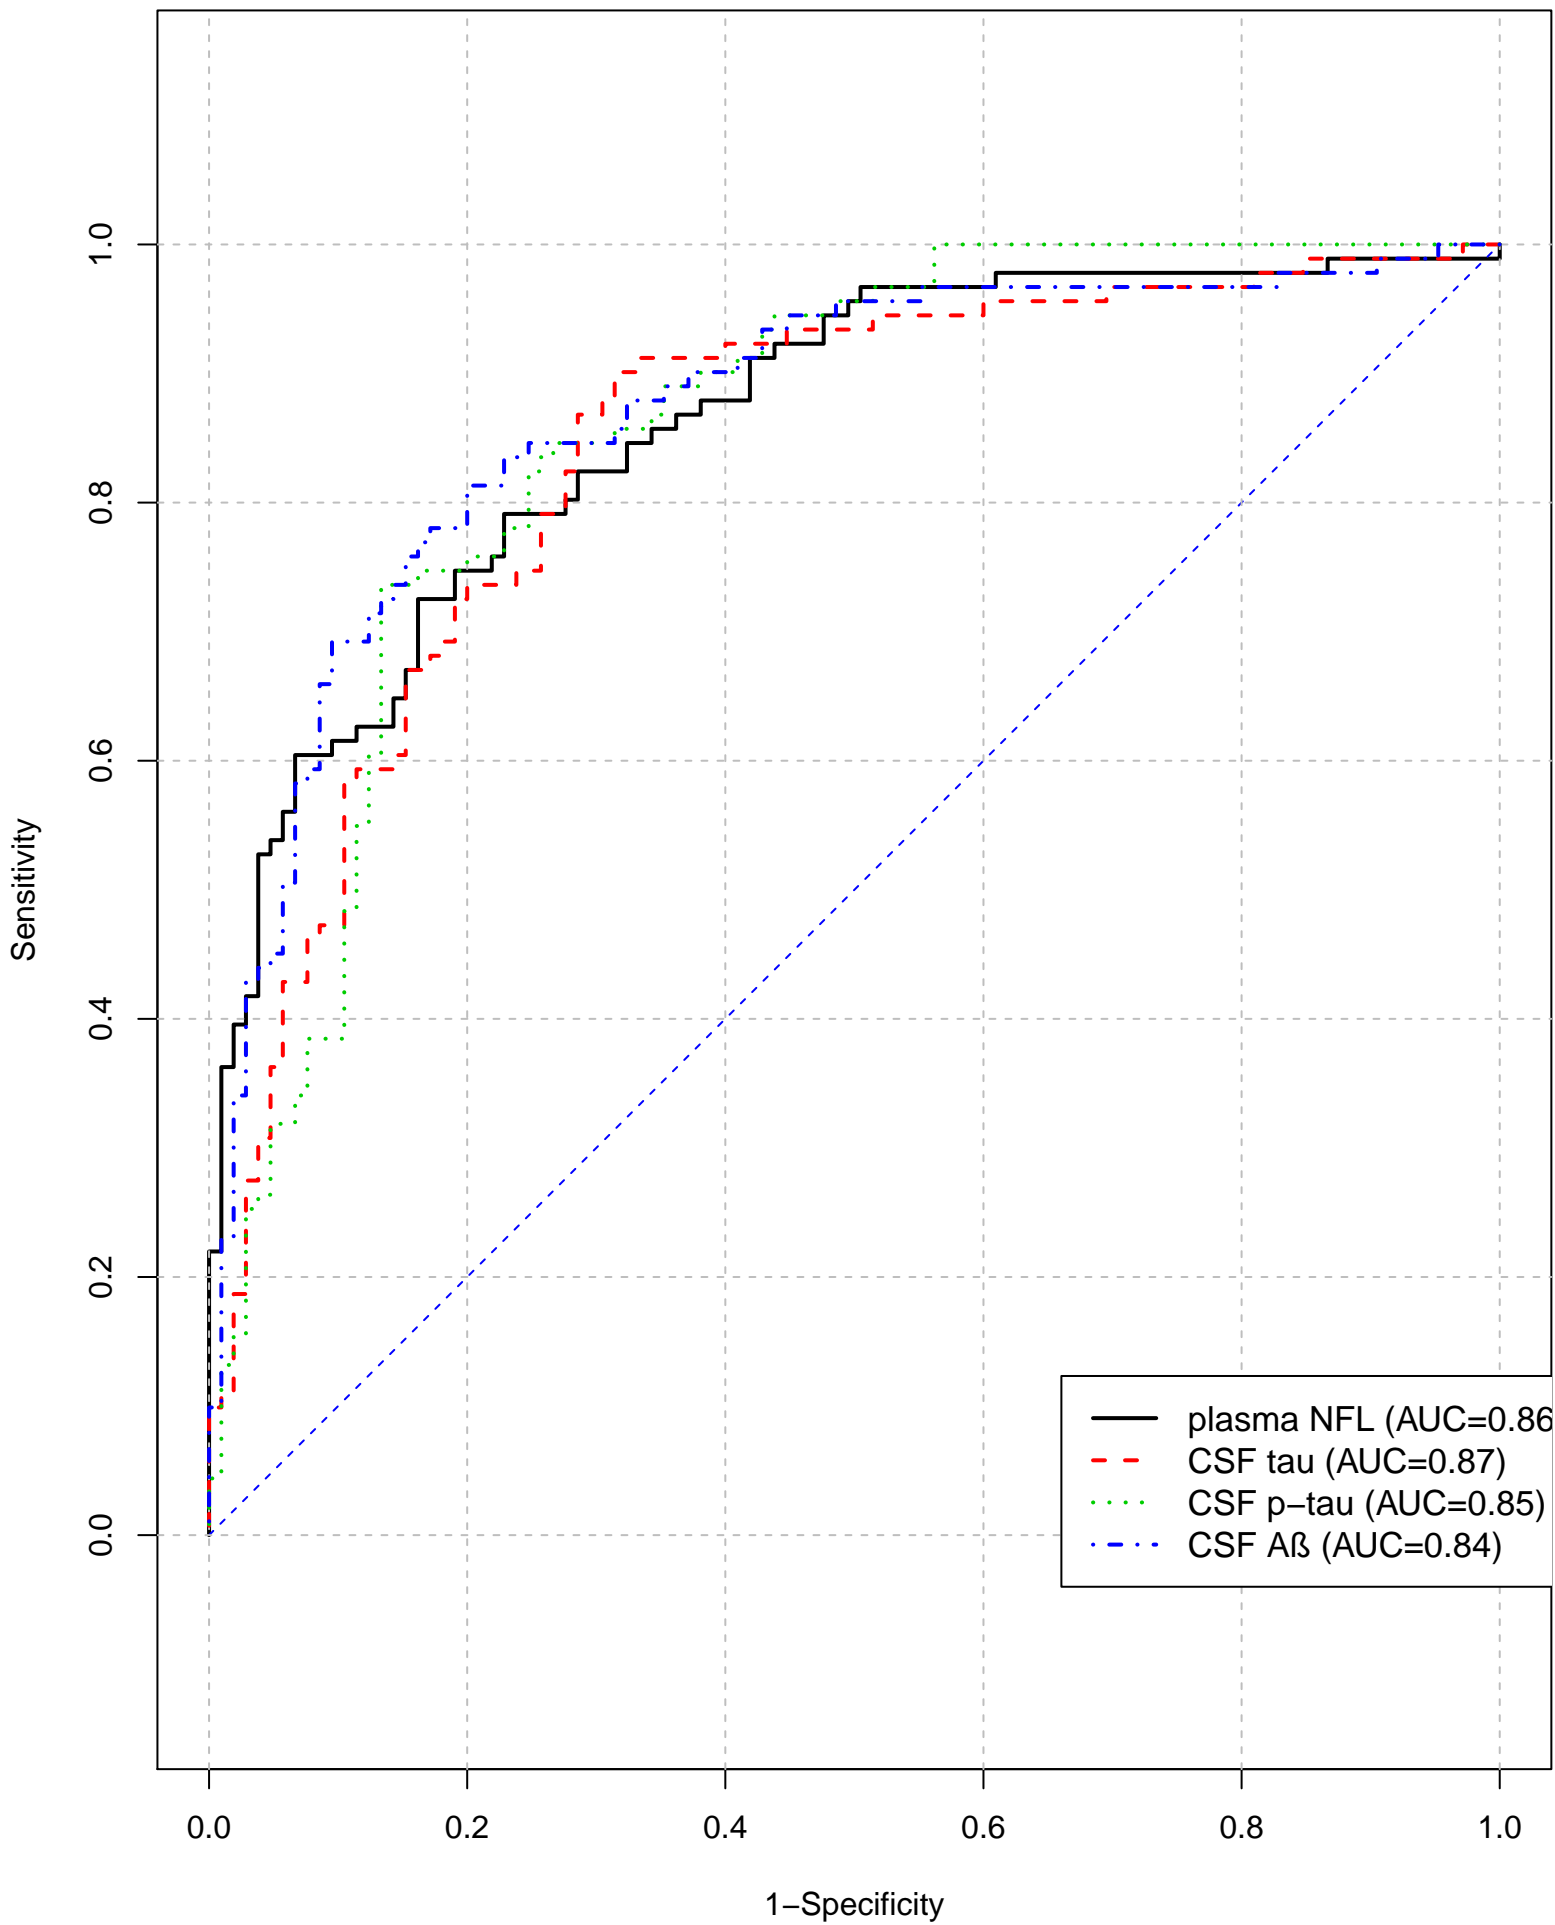

Supplement: 12920_2018_364_MOESM1_ESM.pdf [file 12920_2018_364_MOESM1_ESM.pdf]
